# Supplementary material
Source: publisher site journal article supplement (https://www.dovepress.com/article/585709)
Supplement: Supplementary file 1 [file 585709_Supplementary%20Table%201.docx]

Supplementary Table 1: Variable Selection with Boruta Algorithm

| Vars | Mean Importance | Median Importance | Min Importance | Max Importance | Norm Hits | Decision |
| --- | --- | --- | --- | --- | --- | --- |
| Anti-integrin | 16.72819209 | 17.18356752 | 10.5286725 | 20.6080321 | 1.00000000 | Confirmed |
| Surgical history | 12.20766239 | 12.47532981 | 7.9830783 | 14.9800130 | 1.00000000 | Confirmed |
| Age of diagnosis IL.12... 23 and IL... 23 inhibitors Age | 11.57080392 | 11.82541694 | 6.8823414 | 14.1622578 | 1.00000000 | Confirmed |
| Immunosuppressants | 7.22955906 | 7.18728349 | 4.0747512 | 9.8311644 | 0.96969697 | Confirmed |
| JAK inhibitors | 6.60897620 | 6.75847976 | 4.0150555 | 9.0233651 | 0.96969697 | Confirmed |
| Using hormones at baseline | 3.07225757 | 3.09532034 | 0.2766382 | 5.8561473 | 0.57575758 | Tentative |
| The first upad time | 3.11521776 | 3.06256840 | 0.5403428 | 6.2522457 | 0.52525253 | Tentative |
| Clinical response 52 weeks | 2.27490763 | 2.29498007 | -0.4354561 | 5.1117618 | 0.43434343 | Tentative |
| Anti-integrin | 2.24461106 | 2.17339501 | -0.9198693 | 4.8208166 | 0.36363636 | Tentative |
| Surgical history | 1.29050506 | 1.22694875 | 0.2324777 | 2.2016670 | 0.00000000 | Rejected |
| Discontinuation of medication | 1.03346338 | 0.89767998 | -0.9368753 | 2.9502800 | 0.03030303 | Rejected |
| Course of disease | 0.67265586 | 0.89130020 | -1.9348405 | 2.1789734 | 0.00000000 | Rejected |
| Endoscopic response after 8 weeks | 0.52581709 | 0.45088321 | -1.6568911 | 2.3338352 | 0.00000000 | Rejected |
| CRP biochemical remission after 52 weeks | 0.09088682 | 0.32940913 | -1.3784437 | 1.5886413 | 0.00000000 | Rejected |
| Endoscopic remission after 8 weeks | 0.39440648 | 0.32284643 | -0.9688443 | 1.8430566 | 0.00000000 | Rejected |
| Endoscopic remission after 26 weeks | -0.24648167 | 0.17109859 | -1.7817236 | 0.9439165 | 0.00000000 | Rejected |
| FC biochemical remission after 78 weeks | 0.07530690 | 0.13186100 | -1.4358902 | 1.1997173 | 0.00000000 | Rejected |
| Tacrolimus | 0.00000000 | 0.00000000 | 0.0000000 | 0.0000000 | 0.00000000 | Rejected |
| Tripterygium wilfordii IL.17A.inhibitors | 0.00000000 | 0.00000000 | 0.0000000 | 0.0000000 | 0.00000000 | Rejected |
| Clinical response 26 weeks | 0.00000000 | 0.00000000 | 0.0000000 | 0.0000000 | 0.00000000 | Rejected |
| FC biochemical remission 52 weeks | -0.19161264 | -0.05139378 | -2.0789913 | 1.4495123 | 0.00000000 | Rejected |
| Extracorporeal manifestations | 0.11642949 | -0.06783384 | -2.2571860 | 2.3365848 | 0.00000000 | Rejected |
| Discontinuation of medication | -0.43782775 | -0.15424805 | -1.8608752 | 0.9662028 | 0.00000000 | Rejected |
| Clinical remission after 8 weeks X5.ASA | -0.16593076 | -0.18287511 | -2.1944772 | 1.4499715 | 0.00000000 | Rejected |
| Endoscopic response: 26 weeks | -0.28922835 | -0.18322263 | -2.8294836 | 1.5305501 | 0.00000000 | Rejected |
| FC biochemical remission: 8.12 weeks | -0.52345093 | -0.21455379 | -3.1737277 | 0.6597780 | 0.00000000 | Rejected |
| CRP biochemical remission: 78 weeks | -0.38084843 | -0.23461883 | -2.0523755 | 0.9541965 | 0.00000000 | Rejected |
| FC biochemical remission: 26 weeks | -0.24476464 | -0.26542087 | -1.4209433 | 1.1013998 | 0.00000000 | Rejected |
| CRP biochemical remission: 8.12 weeks | -0.58396672 | -0.28478399 | -2.2846052 | 0.3952730 | 0.00000000 | Rejected |
| Hormone Adverse reaction | -0.48194297 | -0.46088442 | -3.3737839 | 1.6220544 | 0.00000000 | Rejected |
| CRP biochemical remission after 26 weeks | -0.39913094 | -0.46606737 | -1.3553982 | 1.1957157 | 0.00000000 | Rejected |
| Clinical remission after 52 weeks | -0.40812192 | -0.52879410 | -2.0994003 | 1.4519941 | 0.00000000 | Rejected |
| Clinical remission after 8 weeks X5.ASA | -0.70999413 | -0.58728612 | -1.8455153 | 1.0256622 | 0.00000000 | Rejected |
| Endoscopic response: 26 weeks | -0.81038882 | -0.69499429 | -1.6610933 | 0.1686271 | 0.00000000 | Rejected |
| Methotrexate | -0.45224695 | -0.81462763 | -2.1179513 | 2.0908350 | 0.00000000 | Rejected |
| Clinical response 8 weeks | -0.55219931 | -0.87571309 | -2.1549136 | 1.8206202 | 0.00000000 | Rejected |
| Gender | -0.91790272 | -0.88077644 | -2.5441731 | 0.4253765 | 0.00000000 | Rejected |
| CRP biochemical remission 0 weeks | -0.93587718 | -0.88315354 | -2.1881565 | 0.1721714 | 0.00000000 | Rejected |
| Endoscopic response 52 weeks | -1.01556867 | -0.89107535 | -2.0225464 | -0.1947210 | 0.00000000 | Rejected |
| FC biochemical remission 0 weeks | -1.19482260 | -1.12181749 | -2.3803491 | 0.2023729 | 0.00000000 | Rejected |
| Endoscopic remission 52 weeks | -0.94735947 | -1.12870611 | -2.1566980 | 0.2911941 | 0.00000000 | Rejected |
| Clinical remission 26 weeks | -0.84551507 | -1.31504614 | -2.3973857 | 1.6382526 | 0.00000000 | Rejected |
| Anti-TNF | -1.40373657 | -1.34104529 | -2.9939136 | 0.6870074 | 0.00000000 | Rejected |
